# Supplementary material for: Chronic inflammation is a feature of Achilles tendinopathy and rupture
Source: PubMed Central journal article supplement (PMC5867427; doi:10.1136/bjsports-2017-098161), 2017-11-08
Supplement: bjsports-2017-098161supp001.pdf [file bjsports-2017-098161supp001.pdf]

## SUPPLEMENTARY INFORMATION

**Table S1. Primary antibodies used for immunohistochemistry and immunofluorescence**

| Antibody                                       | Clone    | Isotype           | Species | Dilution |
|------------------------------------------------|----------|-------------------|---------|----------|
| IRF5<br>Proteintech<br>10547-1-AP              |          | IgG               | rabbit  | 1:100    |
| CD163<br>LS-Biosciences<br>LS_C174770          | 34B      | IgG <sub>2a</sub> | mouse   | 1:150    |
| CD206<br>Abcam<br>Ab117644                     | 5C11     | IgG <sub>1</sub>  | mouse   | 1:200    |
| CD68<br>Dako<br>M0814                          | KP1      | IgG <sub>1</sub>  | mouse   | 1:50     |
| CD14<br>Proteintech<br>17000-1-AP              |          | IgG               | rabbit  | 1:50     |
| Podoplanin (PDPN)<br>Abcam<br>Ab10288          | 18H5     | IgG <sub>1</sub>  | mouse   | 1:100    |
| CD248 (TEM1)<br>Abcam<br>Ab204914              | EPR17081 | IgG               | rabbit  | 1:1000   |
| CD106 (VCAM-1)<br>LS-Biosciences<br>LS_C313019 |          | IgG               | rabbit  | 1:100    |
| TLR4<br>Abcam<br>Ab22048                       | 76B357.1 | IgG <sub>2b</sub> | mouse   | 1:200    |
| CD31<br>Abcam<br>Ab187377                      | [C31.3]  | IgG <sub>1</sub>  | mouse   | 1:150    |

**Table S2. Primers used for quantitative polymerase chain reaction.**

| <b>Gene Symbol</b>  | <b>Gene Description</b>                     | <b>Sequence</b>                                |
|---------------------|---------------------------------------------|------------------------------------------------|
| <i>β-actin</i>      | Actin, beta                                 | Qiagen QT00095431                              |
| <i>GAPDH</i>        | glyceraldehyde-3-phosphate<br>dehydrogenase | Qiagen QT00079247                              |
| <i>PDPN</i>         | Podoplanin                                  | Qiagen QT01015084                              |
| <i>CD248</i>        | CD248 molecule (endosialin)                 | Qiagen QT00216356                              |
| <i>CD106</i>        | CD106 molecule (VCAM)                       | Qiagen QT00018347                              |
| <i>PTGS2</i>        | Prostaglandin-endoperoxide<br>synthase 2    | Qiagen QT00040586                              |
| <i>IL-8 (CXCL8)</i> | Interleukin 8                               | Qiagen QT00000322                              |
| <i>IRF1</i>         | Interferon regulatory factor 1              | CTGTGCGAGTGTACCGGATG<br>ATCCCCACATGACTTCCTCTT  |
| <i>IRF5</i>         | Interferon regulatory factor 5              | GGGCTTCAATGGGTCAACG<br>GCCTTCGGTGTATTTCCCTG    |
| <i>CXCL10</i>       | Chemokine (C-X-C motif)<br>ligand 10        | TCCACGTGTTGAGATCATTGC<br>TCTTGATGGCCTTCGATTCTG |
| <i>ALOX15</i>       | Arachidonate 15-lipoxygenase                | GGGCAAGGAGACAGAACTCAA<br>GCCGATCCACACGGAGTACT  |
| <i>CD206</i>        | CD206 molecule (mannose<br>receptor)        | Qiagen QT00012810                              |
| <i>CD163</i>        | CD163 molecule                              | Qiagen QT00074641                              |

**Table S3. Antibodies used for flow cytometry.** All antibodies were diluted 1:50 for staining.

| Antibody                                  | Catalog #        | Clone   |
|-------------------------------------------|------------------|---------|
| PDPN Alexa Fluor 488 anti-human           | 337005 BioLegend | NC08    |
| Alexa Fluor 488 Rat IgG2 $\alpha$ isotype | 400525 BioLegend | RTK2758 |
| CD34 PerCP/Cy5.5 anti-human               | 343521 BioLegend | 581     |
| PerCP/Cy5.5 mouse IgG1 $\kappa$ isotype   | 400149 BioLegend | MOPC-21 |
| CD45 BV605 anti-human                     | 304041 BioLegend | H130    |
| BV605 mouse IgG1 $\kappa$ isotype         | 400161 BioLegend | MOPC-21 |

**Figure S1**

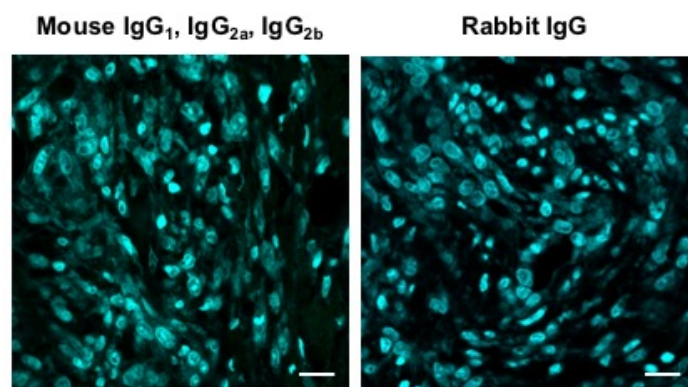

**Figure S1** Isotype control staining of diseased Achilles tendons. Representative confocal immunofluorescence images showing merged image of diseased Achilles tendon sections stained with Isotype control antibodies for mouse IgG1, IgG2a, IgG2b and rabbit IgG fractions. Cyan represents POPO-1 nuclear counterstain. Scale bar, 20 $\mu$ m.
